# Supplementary material
Source: PubMed Central journal article supplement (PMC56973)

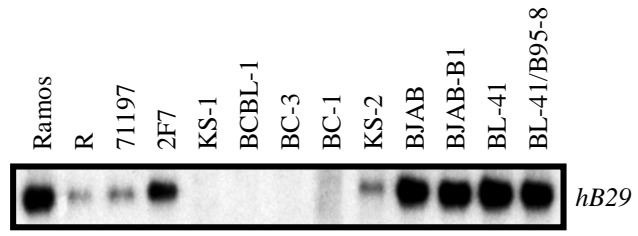

Supplement: pnas_181206898_6.pdf [file pnas_181206898_6.pdf]

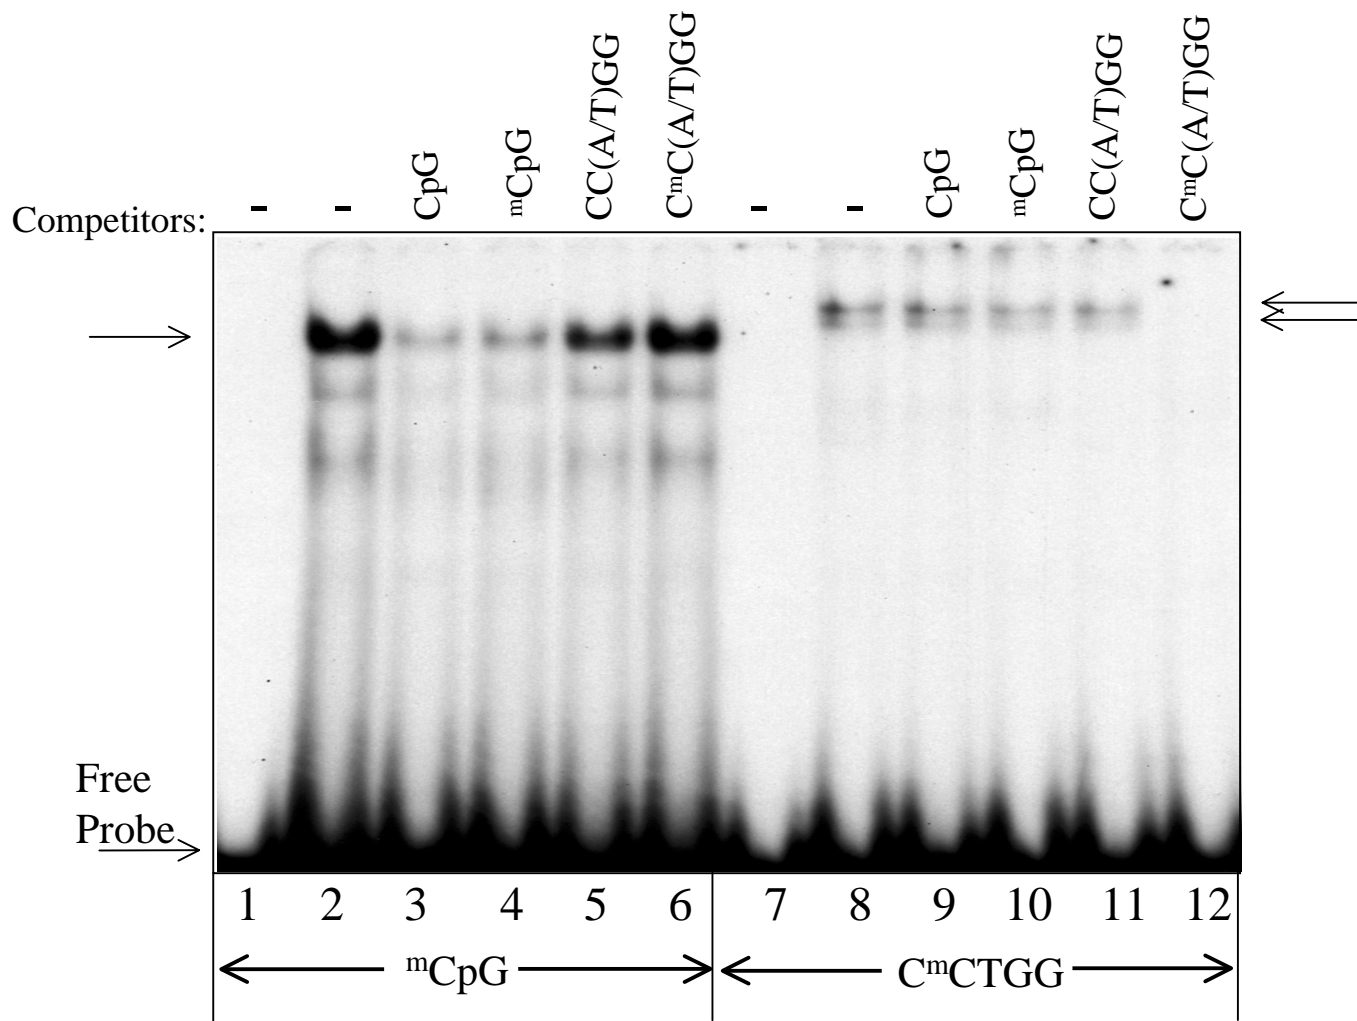

Supplement: pnas_181206898_9.pdf [file pnas_181206898_9.pdf]
